# Supplementary material for: Engineering green and sustainable solvents for scalable wet synthesis of sulfide electrolytes in high-energy-density all-solid-state batteries
Source: Royal Society of Chemistry journal article supplement (doi:10.1039/d2gc04586a), 2023-01-01
Supplement: d2gc04586a1.pdf [file d2gc04586a1.pdf]

*Supporting Information*

**Engineering Green and Sustainable Solvents for Scalable  
Wet Synthesis of Sulfide Electrolytes in High-Energy-  
Density All-Solid-State Batteries**

Yung-Soo Jo<sup>1</sup>, Jeong-Won Hong<sup>1</sup>, Ik-Hyeon Choi<sup>1</sup>, Junghwan Sung<sup>1,2</sup>, Jun-Ho Park<sup>1</sup>, Heetaek Park<sup>1</sup>, Doohun Kim<sup>1,2</sup>, Byung Gon Kim<sup>1,2</sup>, Yoon-Cheol Ha<sup>1</sup>, Jeongsuk Seo<sup>3</sup>, Wan-Young Chung<sup>4</sup>, Kang-Jun Baeg<sup>5\*</sup>, Jun-Woo Park<sup>1,2\*</sup>

<sup>1</sup>Next Generation Battery Research Center, Korea Electrotechnology Research Institute (KERI), Gyeongsangnam-do 51543, Republic of Korea

<sup>2</sup>Department of Electro-Functionality Materials Engineering, University of Science and Technology (UST), Daejeon 34113, Republic of Korea

<sup>3</sup>Department of Chemistry, Chonnam National University (CNU), Gwangju 61186, Republic of Korea

<sup>4</sup>Department of Electronic Engineering, Pukyong National University (PKNU), Busan 48513, Republic of Korea

<sup>5</sup>Department of Nanotechnology Engineering, Pukyong National University (PKNU), Busan 48513, Republic of Korea

\*To whom correspondence should be addressed. Telephone/Fax:

Jun-Woo Park: +82-55-280-1684/+82-55-280-1590. E-mail: [parkjw@keri.re.kr](mailto:parkjw@keri.re.kr)

Kang-Jun Baeg: +82-51-852-6397/+82-51-629-6388. E-mail: [kangjun100@pknu.ac.kr](mailto:kangjun100@pknu.ac.kr)

## 1. Investigation of the electrochemical behavior of electrolytes

Ohmic resistances ( $R_{SE}$ ) of SEs were calculated by  $\sigma_{ion}$  from Table 2 and geometric factor (thickness  $l$  and area  $A$ ) of SEs ( $R_{SE} = l/(\sigma_{ion} \cdot A)$ ). Then, ohmic overpotentials were calculated by ohmic resistance and current density ( $V = IR$ ). (Fig. S1)

The overpotentials of THF(8.72mV), 2-MeTHF(8.87mV), CPME(9.17 mV), G1(12.38 mV) cells were higher than ohmic polarizations of SEs (4.37 mV, 5.39 mV, 5.31 mV, and 4.59 mV, respectively). The discrepancy between the cell overpotential and ohmic polarization of SE might be originated from interfacial resistance between Li metal and solid electrolyte.

However, compared to the above samples, G2, G3, and G4 cells exhibited unstable cycle performances. The overpotentials of G2 and G3 cells suddenly dropped after cycling a few times (12  $\rightarrow$  7.34 mV, 12  $\rightarrow$  4.74 mV for G2, G3 cells respectively), and the overpotentials were lower than the ohmic polarization in each sample (8.11 mV and 9.26 mV, respectively). It can be considered a soft short-circuit behavior, as reported in previous studies.[1] On the other hand, the failing behavior of the G4 cell was different of the G2 and G3 cells. The overpotential of G4 samples increased abruptly after  $\sim$ 80 hours, and we speculate that it might be related to a large amount of impurities in the G4 sample (**Fig. 6m – XRD**).

[S1] N. J. Taylor, S. S. Molo, C. G. Haslam, A. Sharafi, T. Thompson, M. Wang, R. G. Mendez, J. Sakamoto. Demonstration of high current densities and extended cycling in the garnet  $\text{Li}_7\text{La}_3\text{Zr}_2\text{O}_{12}$  solid electrolyte. *Journal of Power Sources* **396**, 314-318(2018). <https://doi.org/10.1016/j.jpowsour.2018.06.055>.

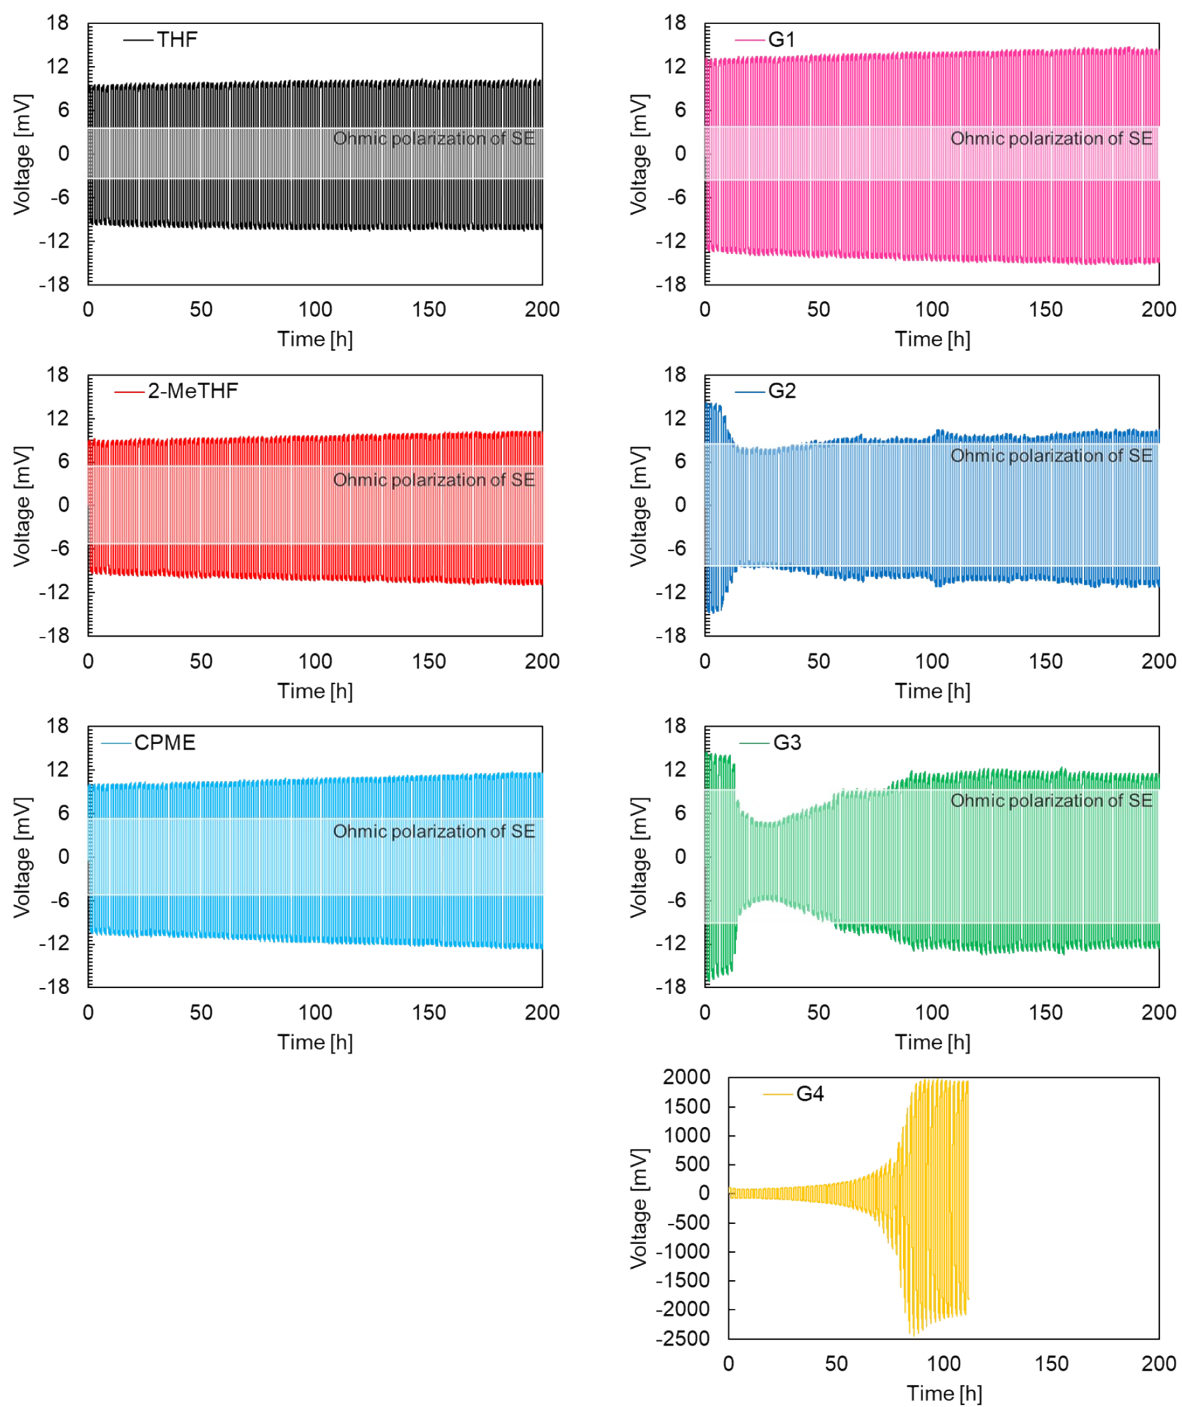

**Fig. S1.** Voltage profiles of the symmetrical Li/Li cells with LPSCI SEs prepared with various solvents; THF, 2-MeTHF, CPME, and glymes (G1-G4).

## 2. Reproducibility of ASSBs

**Table S1.** Discharge capacities of ASSB cells with LPSCI SEs prepared using THF and various greener alternatives and sustainable solvents; 2-MeTHF, CPME, G1, G2, G3, and G4 for each C-rates from 0.1C to 2.0C.

| C-rate | Discharge capacity [mAh g <sup>-1</sup> ] |          |          |          |          |          |          |
|--------|-------------------------------------------|----------|----------|----------|----------|----------|----------|
|        | THF                                       | 2-MeTHF  | CPME     | G1       | G2       | G3       | G4       |
| 0.1C   | 177.5278                                  | 192.5776 | 166.3057 | 169.1075 | 158.7253 | 148.9147 | 28.6741  |
|        | 173.6746                                  | 184.6486 | 159.7478 | 160.3497 | 154.3544 | 152.4864 | 22.2798  |
|        | 170.4677                                  | 180.4354 | 154.3344 | 166.4676 | 146.1359 | 144.6486 | 25.5473  |
| 0.2C   | 172.9806                                  | 174.5262 | 153.1806 | 161.4197 | 126.091  | 106.2834 | 13.90979 |
|        | 166.1564                                  | 166.1548 | 148.3487 | 156.7687 | 123.4676 | 103.6841 | 9.5463   |
|        | 165.4641                                  | 164.6425 | 140.6476 | 150.6432 | 113.4654 | 97.5954  | 10.3867  |
| 0.5C   | 162.8671                                  | 140.4844 | 132.5169 | 149.1674 | 74.79097 | 54.6562  | 4.829311 |
|        | 154.6344                                  | 132.6487 | 120.9687 | 142.6744 | 70.7983  | 50.1347  | 2.6987   |
|        | 156.4678                                  | 135.4687 | 124.6746 | 137.3547 | 62.3547  | 52.3647  | 2.1335   |
| 1C     | 148.2142                                  | 99.59706 | 111.7479 | 139.5137 | 35.43078 | 22.20558 | 0        |
|        | 144.6547                                  | 85.6874  | 102.5468 | 132.8412 | 32.4567  | 20.3774  | 0        |
|        | 139.6874                                  | 90.467   | 90.5467  | 122.6143 | 21.5463  | 12.6741  | 0        |
| 2C     | 95.1244                                   | 50.64229 | 82.33707 | 85.26075 | 9.413808 | 2.698183 | 0        |
|        | 96.8463                                   | 39.4349  | 75.6541  | 71.3741  | 5.7531   | 2.8543   | 0        |
|        | 89.6449                                   | 40.6797  | 72.1354  | 75.8413  | 0        | 0        | 0        |

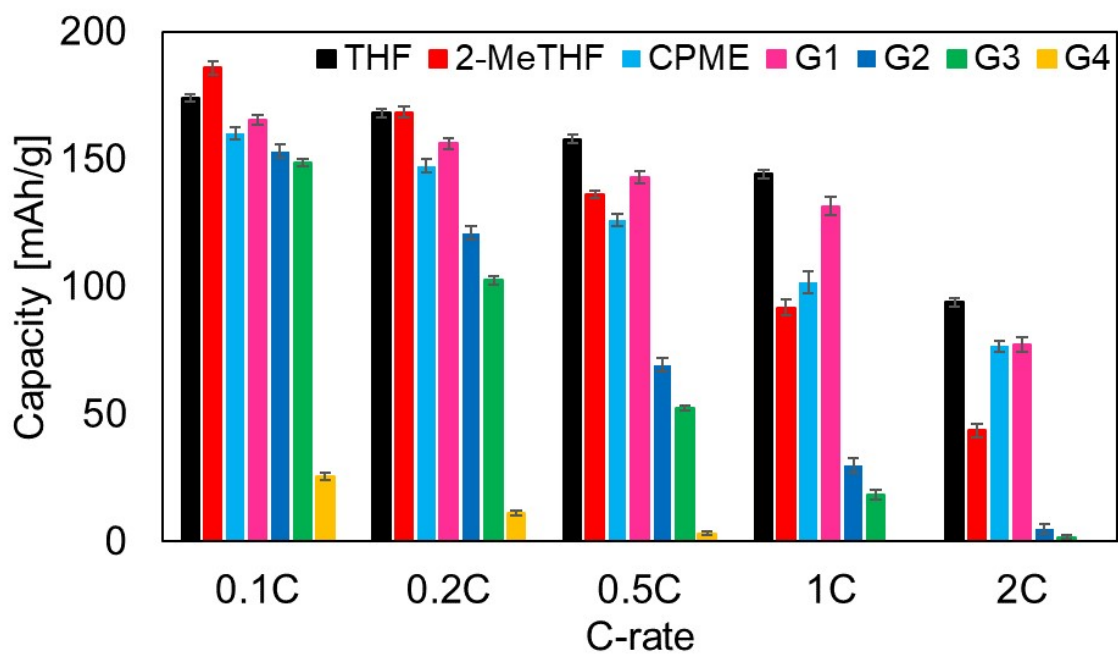

**Fig. S2.** Discharge capacities and corresponding standard deviation of ASSB cells with LPSCI SEs which wet-synthesized using conventional petrochemical solvent (THF) and various greener alternatives and sustainable solvents; 2-MeTHF, CPME, G1, G2, G3, and G4 for each C-rates from 0.1C to 2.0C
